# Supplementary material
Source: ML conference proceedings conference paper supplement (https://www.ecva.net/papers/eccv_2024/papers_ECCV/html/3209_ECCV_2024_paper.php)
Supplement: Supplementary file 1 [file 03209-supp.pdf]

# PLOT: Text-based Person Search with Part Slot Attention for Corresponding Part Discovery

## — *Supplementary Materials* —

Jicheol Park , Dongwon Kim , Boseung Jeong , and Suha Kwak 

Pohang University of Science and Technology (POSTECH), South Korea  
{jicheol, kdwon, boseung01, suha.kwak}@postech.ac.kr  
<https://cvlab.postech.ac.kr/research/PLOT>

This supplementary material presents auxiliary feature reconstruction loss function and experimental results omitted from the main paper due to the space limit. We first describe the auxiliary feature reconstruction loss for the part discovery module in Sec. A . In Sec. B , we provide a comparison with Rasa [1], a reranking-based text-based person search method that utilizes a classifier for calculating similarity scores between text queries and images. Thereafter, Sec. C offers more ablation studies on variants of our method, such as other similarity aggregation methods, the use of the GRU update in the PSA block, and varying the number of part slots. Lastly, Sec. D presents additional qualitative results. Also, we pledge to release all associated code for our method and experimental evaluation to the public domain.

### A Feature Reconstruction for Part Discovery

To train our part discovery module, inspired by the object-centric learning method [3], we utilize an auxiliary loss for reconstruction. When a set of part slots is able to reconstruct the original input data, it suggests that each slot is associated with unique part entities in the input. For efficient reconstruction, we opt to conduct reconstruction in the feature space rather than directly reconstructing the raw input data; in other words, we reconstruct the outputs of the backbones for each input modality, namely the patch tokens  $\mathbf{x}^{\mathcal{V}}$  and text tokens  $\mathbf{x}^{\mathcal{T}}$ . To do this, we leverage the reconstruction loss  $L_{\text{recon}}$ , which is formulated as follows:

$$\mathcal{L}_{\text{Recon}} = \frac{1}{B} \sum_{i=1}^B ( \| \mathbf{x}_i^{\mathcal{V}} - f_{\text{dec}}^{\mathcal{V}}(\mathbf{P}_i^{\mathcal{V}}) \|^2 + \| \mathbf{x}_i^{\mathcal{T}} - f_{\text{dec}}^{\mathcal{T}}(\mathbf{P}_i^{\mathcal{T}}) \|^2 ),$$

where  $\mathbf{P}$  is represents the part embedding, output from the part discovery module for each modality, and  $f_{\text{dec}}$  is the decoder used for reconstruction in each modality. The decoder  $f_{\text{dec}}$  follows the structure of the spatial broadcast decoder [4] used in slot attention [3], which takes part embeddings as input and duplicates each part embedding a number of times corresponding to the target tokens for reconstruction. Then, the duplicated part embeddings are added with learnable positional embeddings. Finally, these enhanced part embeddings are

**Table A:** Comparison to RaSa [1] on the CUHK-PEDES and ICFG-PEDES datasets.

| Methods  | CUHK-PEDES   |              |              |         | ICFG-PEDES   |              |              |         | RSTPReid     |              |              |         |
|----------|--------------|--------------|--------------|---------|--------------|--------------|--------------|---------|--------------|--------------|--------------|---------|
|          | R@1          | R@5          | R@10         | Time(s) | R@1          | R@5          | R@10         | Time(s) | R@1          | R@5          | R@10         | Time(s) |
| RaSa [1] | <b>76.51</b> | 90.29        | <b>94.25</b> | 1168    | 65.28        | 80.40        | 85.12        | 3871    | <b>66.90</b> | <b>86.50</b> | <b>91.35</b> | 388     |
| Ours     | 75.28        | <b>90.42</b> | 94.12        | 16      | <b>65.76</b> | <b>81.39</b> | <b>86.73</b> | 91      | 61.80        | 82.85        | 89.45        | 5       |

fed into multi-layer perceptron (MLP) with ReLU activation function to obtain aggregated reconstruction features across part embeddings by predicting target tokens and aggregation weights for each part embeddings on the duplicated positions.

## B Comparison to Recent Work

RaSa [1] is one of the most recent text-based person search methods, which adopts the pre-trained ALBEF [2] model as its backbone. In inference, RaSa initially computes cosine similarity using global embeddings between query texts and images, then re-ranks the top-k images per query. The re-ranking process calculates cross-attention between each query text and its corresponding top-k images by employing an additional transformer-based model. Then, the output of the transformer, a cross-attended feature obtained with cross attention, is fed into a classifier to predict a matching score of query and image pair. Although the re-ranking process enhances retrieval accuracy, the necessity of an additional transformer feedforward pass adds a significant computational load during inference. In Table A, we compare the proposed method and RaSa, in terms of Recall@K and the latency of inference. The results demonstrates that our method is at least 40 times faster during inference time, while maintaining or surpassing performance of RaSa in Recall@K metrics.

## C More Ablation Studies

**Ablation Study on Part Similarity Aggregations:** To demonstrate the effectiveness of our TDPA for similarity aggregation of part embeddings, we conduct comparative experiments with an alternative aggregation approach. As demonstrated in Table B(a), the cumulative sum is a similarity aggregation approach that simply sums the similarities across all part embeddings. This approach inevitably leads to a decrease in performance due to the inclusion of non-informative elements, particularly affecting the R@1 metric. Therefore, our TDPA method, by dynamically adjusting important part slots for each text query, significantly contributes to the enhancement of retrieval performance.

**Benefits of adopting GRU in PSA block:** Within the PSA block, GRU facilitates learning-based decisions on the use of information from previous part slots for each update. The ablation study in Table B(b) empirically demonstrates that GRU contributes to the performance.

**Table B:** Ablation studies on CUHK-PEDES dataset.

| Methods                  | R@1   | R@5   | R@10  |
|--------------------------|-------|-------|-------|
| (a) Cumulative Sum       | 73.96 | 89.73 | 93.84 |
| (b) Ours w/o GRU         | 74.33 | 89.49 | 93.52 |
| Ours w/ 4 part slots     | 73.79 | 89.88 | 93.22 |
| (c) Ours w/ 6 part slots | 75.02 | 89.93 | 94.23 |
| Ours w/ 10 part slots    | 74.51 | 90.21 | 94.56 |
| Ours                     | 75.28 | 90.42 | 94.12 |

**Effect of the number of part slots:** Table B(c) shows that performance improves when there are enough part slots to segment the input data into distinct parts. However, if more part slots are provided than the distinctive parts in the input data, it does not offer significant benefits.

## D More Qualitative Results

Fig. A shows the more visualization of attention map  $\bar{A}_k$  in  $T$ -th iteration of PSA block for both modality and TDPA weights  $\mathbf{a}$  on CUHK-PEDES dataset. Most of the presented results demonstrate that the part embeddings extracted by our part discovery module capture distinctive human parts. Moreover, it shows the part embeddings extracted from the same part slot represent identical part although they are computed from different modalities. Furthermore, we can find the effectiveness of TDPA that enables adaptive part-based retrieval by focusing more on the distinctive human parts presented in the query text (Fig. A(a,b,c,e)). Besides, TDPA addresses the limitation of slot attention; due to the mutually exclusive property of slot attention, a slot may draw attention on an irrelevant area if its corresponding part is not present. For example, Part 4 semantically corresponds to the shoe areas, but since no shoe exists in Fig. A(b) and Fig. A(h), the associated slot instead attends to irrelevant regions. However, to address this limitation, TDPA assigns low weights to Part 4 if shoes are not presented.

Also, we provide top-5 retrieval results of our method on three datasets are presented in Fig. B, Fig. C, and Fig. D, respectively. Most of the presented results illustrate that our method successfully retrieves the target individual. We observe consistent retrieval results even in the presence of obstacles or variations in human poses. In the retrieval results of false matches, the retrieved images are either very similar to other true matches (Fig. B(e) and Fig. D(h)) or contain the distinctive human parts described in the text query (Fig. C(g) and Fig. D(f)).

Query: the man is wearing a black shirt with a gray zip up jacket. he also has red / white tennis shoes and has short shaggy hair.

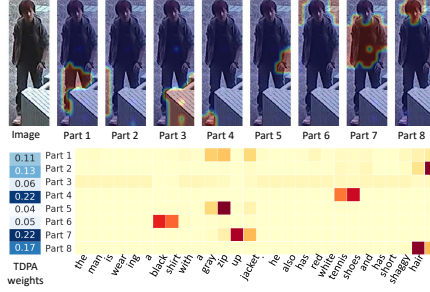

(a)

Query: the woman has long , dark hair pulled up into a ponytail. she is wearing a black dress with a white collar and carrying a handbag.

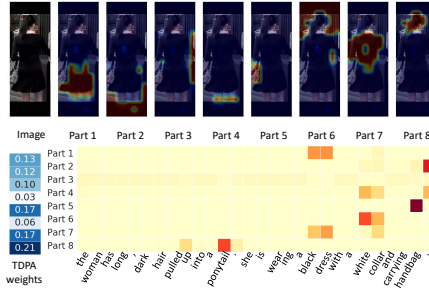

(b)

Query: the woman wears a light orange cardigan with a white flower dress white tennis shoes . she has glasses and carries a small red purse.

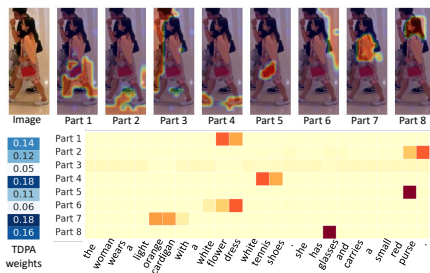

(c)

Query: a lady in a dress and sandals carrying a handbag and umbrella walking on wet concrete .

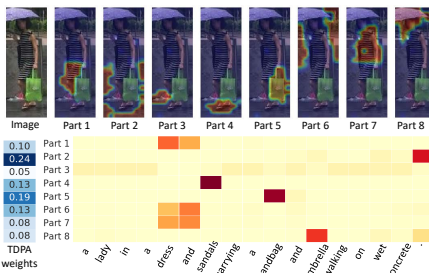

(d)

Query: a pedestrian walking to the right with a black bag on their back, grey pants, and red shoes.

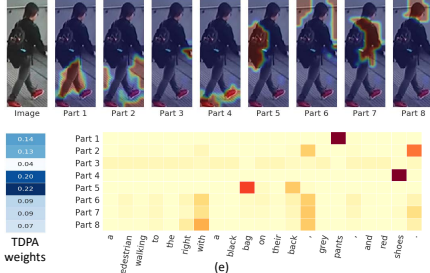

(e)

Query: the man is wearing a green polo shirt and black shorts with white sneakers and a black/white hat.

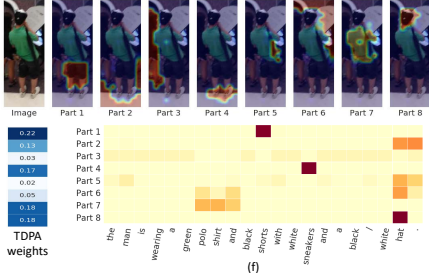

(f)

Query: she is covering her face from view with a shopping bag. she is also wearing a white shirt and denim shorts.

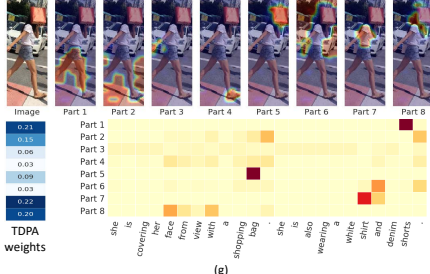

(g)

Query: the woman has glasses and is carrying a pink bag. she is wearing a striped top and black pants. she is holding a child with one hand.

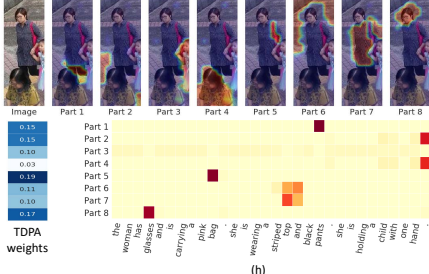

(h)

Fig. A: Visualization of each modality’s attention map  $\bar{A}_k$  in  $T$ -th iteration of PSA block and TDPA weights  $\mathbf{a}$  on CUHK-PEDES dataset.

**Query:** a woman has a ponytail swinging to the left held with a white hairband while she holds a white document in her left hand. she wears a gray jacket with wide hood curved over her back, a blouse hem covering her hips, deep-blue pants ending below the knees and white shoes with black trim.

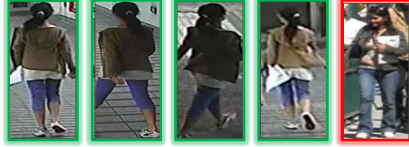

(a)

**Query:** a woman with a ponytail looks slightly to her right, has her right arm at her side, carries a black shoulder bag over her left shoulder and behind her hand, and steps forward with her right foot. she wears a white t - shirt with black lines drawn over the front, a denim miniskirt and white running shoes.

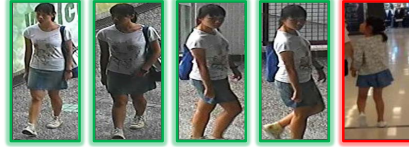

(b)

**Query:** the woman is wearing a white tee shirt and patterned capri pants. she is wearing black and white shoes, and had dark hair. she appears to be carrying a red object in her left hand.

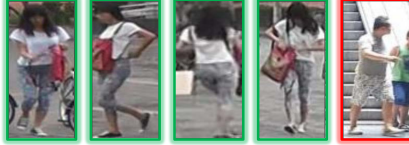

(c)

**Query:** person wearing a dark brown sweater, denim cropped pants that go just below the knees, and white sneakers. they are wearing a red backpack over both shoulders.

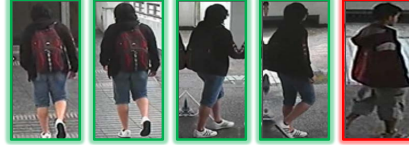

(d)

**Query:** this women is wearing a red coat with white trim at the wrists and neck. she appears to be wearing black tights or skinny jeans and black flat shoes. she has her black hair in a ponytail and is talking on the phone that she holds in her left hand.

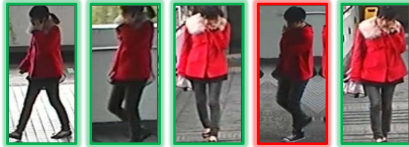

(e)

**Query:** the lady is wearing a black short sleeve t-shirt with a colorful print on the front in the shape of a square. she is wearing dark capri pants and light colored shoes.

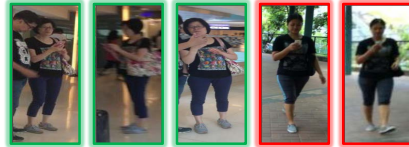

(f)

**Query:** she is wearing short, blue jean shorts, a v-necked halter top, and a dark jacket. she is holding a wine glass in both hands.

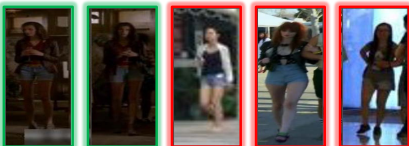

(g)

**Query:** too blurry to describe but it looks like a white female wearing a black jacket (open) with a white top and dark colored skirt or dark capri pants and black shoes.

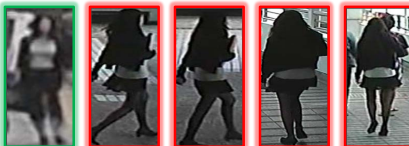

(h)

**Fig. B:** Top-5 retrieval results of our method on the CUHK-PEDES dataset. Images are sorted from left to right according to their ranks below each text query. Green and red boxes indicate true and false matches, respectively.

**Query:** a young man wearing a dark grey color jacket with hood and light grey color pant with red color strips with sky blue color sneakers. he is carrying a red, brown and grey color backpack on his back.

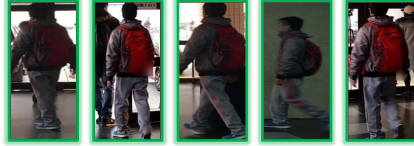

(a)

**Query:** a man in his forties with short black hair is wearing a royal blue hooded jacket with white trousers. he is wearing off white running shoes with grey soles. he has a grey and black bag around his shoulder. he has his hands in his jacket's pocket.

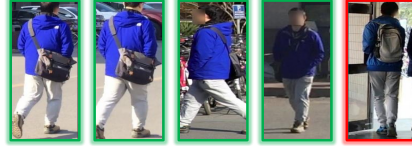

(b)

**Query:** a young woman is wearing a long blue and grey insulated jacket with white fur on the hood and black leggings. she is also wearing black running shoes which have white soles.

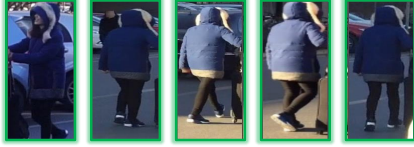

(c)

**Query:** a lady in her late twenties with long black kurta over yellow hoodie jacket and black jeans. she is wearing white sneakers shoes and holding white handbag.

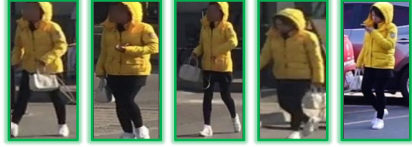

(d)

**Query:** a woman with straight shoulder length brown hair is wearing a long black puffer jacket. she is wearing black tights and ankle-length yellow boots. she is carrying a pink bag on her shoulder.

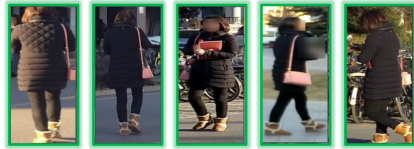

(e)

**Query:** a young boy us wearing a black insulated vest over a full-sleeved green and blue t-shirt with gray sweatpants. he is wearing black shoes with blue laces and is carrying a brown backpack.

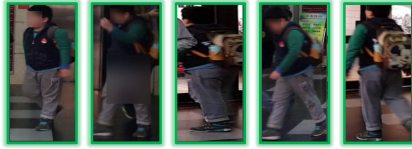

(f)

**Query:** a man in his mid 30's having short hair with receding hairline and wearing spectacles. he is wearing an army color puffer jacket and black formal pants.

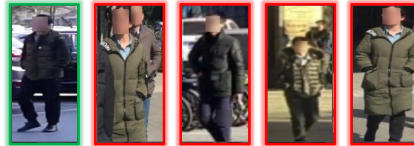

(g)

**Query:** a middle-aged man with medium length black hair parted sideways is wearing a dark grey fleece coat with black buttons over blue-white striped polo. he has a black bag strap around his shoulders .

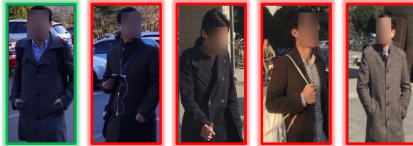

(h)

**Fig. C:** Top-5 retrieval results of our method on the ICFG-PEDES dataset. Images are sorted from left to right according to their ranks below each text query. Green and red boxes indicate true and false matches, respectively.

**Query:** this female walker is wearing a long grey coat with fur collar and some white writing on it. she also wears a hat with zebra pattern and black pants. she carries a hand bag and something in her hand.

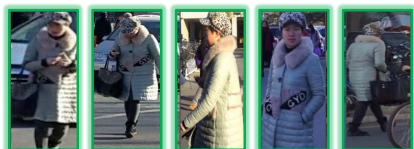

(a)

**Query:** the man with the bright blue hood is wearing a black overcoat and a piece of blue clothing inside. his pants are black while shoes are brown. and he is wearing a pair of dark gloves.

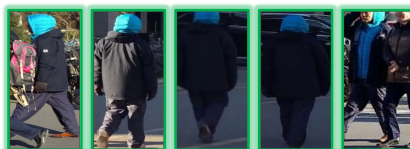

(b)

**Query:** the focus is on this man 's back and he wear a black and red jacket and loose grey pants with a bag over his shoulder.

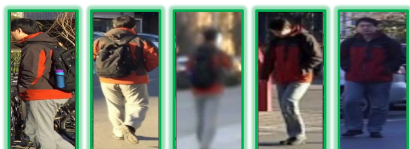

(c)

**Query:** the woman had a ponytail, a grey down jacket, beige trousers and black boots. she was carrying a light blue backpack. she's buttoning herself.

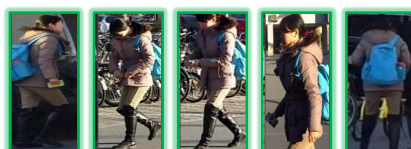

(d)

**Query:** the focus is on this woman's back and she is covering her hair with jacket's hat as she wears a blue coat with grey edging and black tight pants with a luggage.

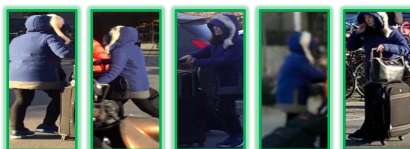

(e)

**Query:** the man was wearing a brown coat, black trousers and grey shoes. he was walking with a green backpack on his back.

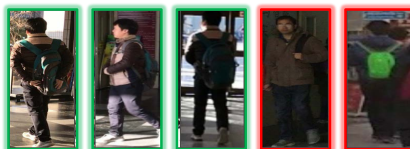

(f)

**Query:** the man is wearing a dark overcoat with the hood, a pair of black trousers and a pair of black shoes. and he is holding a black cellphone.

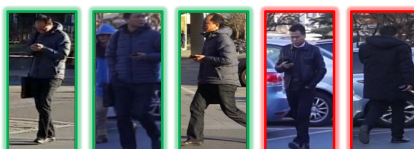

(g)

**Query:** back of a female walker covering her head with her pink down jacket's hat. she is facing forward and seems like very cold.

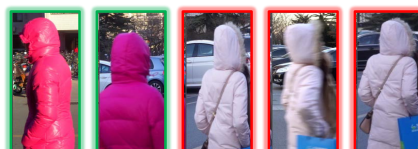

(h)

**Fig. D:** Top-5 retrieval results of our method on the RSTPReid dataset. Images are sorted from left to right according to their ranks below each text query. Green and red boxes indicate true and false matches, respectively.

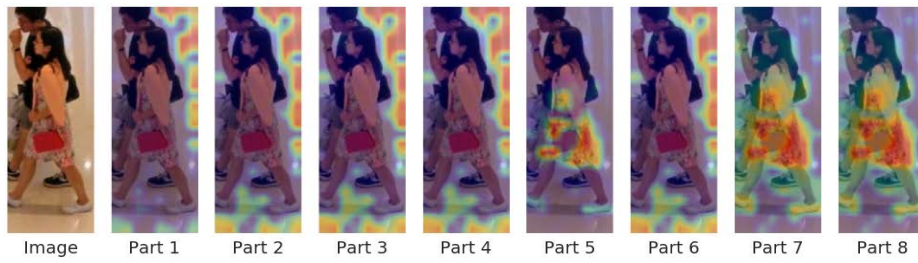

**Fig. E:** Visualization of part attentions with PAT applied to ours.



## References

1. Bai, Y., Cao, M., Gao, D., Cao, Z., Chen, C., Fan, Z., Nie, L., Zhang, M.: Rasa: Relation and sensitivity aware representation learning for text-based person search (2023)
2. Li, J., Selvaraju, R.R., Gotmare, A.D., Joty, S., Xiong, C., Hoi, S.: Align before fuse: Vision and language representation learning with momentum distillation. In: Proc. Neural Information Processing Systems (NeurIPS) (2021)
3. Locatello, F., Weissenborn, D., Unterthiner, T., Mahendran, A., Heigold, G., Uszkoreit, J., Dosovitskiy, A., Kipf, T.: Object-centric learning with slot attention (2020)
4. Watters, N., Matthey, L., Burgess, C.P., Lerchner, A.: Spatial broadcast decoder: A simple architecture for learning disentangled representations in vaes (2019)
